# Supplementary material for: TMEM120A is a coenzyme A-binding membrane protein with structural similarities to ELOVL fatty acid elongase
Source: eLife. 2021 Aug 10;10:e71220. doi: 10.7554/eLife.71220 (PMC8376247; doi:10.7554/eLife.71220)
Supplement: Figure 5—source data 1. [file elife-71220-fig5-data1.xlsx]

## Sheet: Sheet1
##BLOCKS= 2
Note:
Basic Endpoint Protocol
Use this protocol for endpoint assays that have unknowns that will have concentrations interpolated from a standard curve. Modify the instrument setup for the wavelength(s) of interest for your assay. You may also modify the template to include additional standards, unknowns, and controls. To make modifications, click the plate section to make it active.
READER SUITABILITY:
SpectraMax M2, M2e, M3, M4, M5, and M5e.
SpectraMax Plus 384, 190, SpectraMax 190, 340PC 384 and VersaMax
Emax and Vmax
PROTOCOL REVISION HISTORY:
03/02/11 - Imported from 5.4 and edited. (ELM)
10/11/11 - Updated with the additional instruments supported in SMP 6.1
~End
Plate:	5182021	1.3	TimeFormat	Kinetic	Fluorescence	FALSE	Raw	FALSE	23	180	8				1	587	1	6	96	535	Automatic	570			3
Time	Temperature(¡C)	A1	A2	A3	A4	A5	A6	A7	A8	A9	A10	A11	A12	B1	B2	B3	B4	B5	B6	B7	B8	B9	B10	B11	B12
00:00:00	21.9	212.664	843.218	1813.02	3151.08	4368.94	5902.11							1058.05	2896.54	3840.78	4959.25	6278.1	578.214
00:00:08	22	215.649	848.738	1786.35	3146.45	4421.19	5897.82							1067.35	2915.23	3851.94	4968.79	6265.92	581.674
00:00:16	22	217.21	855.235	1796.15	3154.62	4423.52	5902.44							1071.17	2903	3848.96	4973.22	6296.69	577.128
00:00:24	22	217.563	855.418	1806.62	3152.73	4461.79	5894.38							1074.61	2911.13	3848.78	4971.26	6282.94	571.682
00:00:32	22	220.558	848.878	1804.07	3155.06	4350.73	5916.79							1073.29	2920.85	3846.29	4984.37	6319.15	588.387
00:00:40	22	223.388	857.584	1821.13	3159.22	4359.24	5918.11							1068.09	2902.98	3857.34	4955.13	6299.24	590.823
00:00:48	22	221.999	836.661	1836.45	3170.27	4376.66	5880.83							1072.2	2923.37	3858.33	4964.33	6279.08	589.687
00:00:56	22	222.529	850.384	1793.7	3182.69	4406.54	5886.48							1066.4	2914.25	3858.39	4976.66	6296.85	593.018
00:01:04	22	222.445	849.465	1791.71	3166.79	4410.67	5893.51							1068.62	2910.27	3852.15	4976.55	6271.27	590.63
00:01:12	22	221.049	856.6	1807.19	3156.13	4468.54	5891.06							1062.53	2916.41	3849.3	4982.41	6302.77	583.64
00:01:20	22	225.144	848.744	1806.24	3155.96	4363.88	5895.48							1076.83	2916.12	3834.47	4975.8	6308.19	586.896
00:01:28	22	222.056	852.104	1823.41	3165.53	4350.47	5884.89							1066.12	2914.25	3852.4	4986.84	6323.21	580.086
00:01:36	22	221.259	844.635	1777.04	3184.66	4390.41	5894.12							1069.3	2902.93	3861.32	4976.02	6302.96	589.583
00:01:44	22	226.986	856.168	1800.09	3165.78	4404.89	5901.47							1085.69	2914.19	3865.01	4972.32	6303.33	591.759
00:01:52	22	225.334	853.314	1778.34	3168.53	4412.03	5892.73							1069.71	2909.87	3858	4967.31	6299.95	588.498
00:02:00	22	225.929	857.482	1810.84	3161.71	4460.21	5880.59							1072.75	2926.77	3835.1	4981.07	6305.21	585.862
00:02:08	22.1	222.258	851.226	1821.65	3149.24	4341.44	5909.71							1070.46	2933.1	3826.5	4982.52	6320.01	580.974
00:02:16	22.1	225.531	855.784	1818.35	3171.03	4365.94	5912.89							1075.86	2918.27	3841.52	4961.9	6314.82	587.89
00:02:24	22.1	226.285	852.274	1820.69	3159.45	4393.02	5902.14							1075.76	2923.66	3865.19	4975.63	6315.78	590.378
00:02:32	22.1	225.095	854.337	1792.56	3169.25	4397.78	5894.21							1075.43	2918.43	3874.83	4979.01	6304.81	580.227
00:02:40	22.1	223.18	851.87	1809.33	3177.31	4421.21	5896.96							1083.84	2922.77	3851.52	4969.24	6296.23	586.701
00:02:48	22.1	223.453	855.116	1808.88	3159.09	4444.66	5870.85							1087.13	2934.46	3843.84	4985.87	6311.4	581.565
00:02:56	22.1	224.479	853.603	1816.72	3167.76	4454.81	5905.76							1079.64	2921.47	3853.95	4967.48	6296.82	586.683
~End
Original Filename: 05182021_1; Date Last Saved: 5/18/2021 9:41:16 PM
										Simple linear regression Equation from Standard CoA
	CoA Standard (nmol)	0	0.2	0.4	0.6	0.8	1			Y = 5769*X - 382.9			TMEM120A Pr (uL)	1	3	4	5	7	4ul buffer Balnk
	ReadOut Ave	222.263	851.689	1806.11	3163.06	4402.11	5896.75						ReadOut Ave	1072.64	2916.1	3851.13	4973.61	6299.77	585.304
	w/o Background Read	0	629.426	1583.85	2940.79	4179.85	5674.49						no Buffer Background Read	487.34	2330.8	3265.82	4388.3	5714.47	0
													CoA (nmol)	0.150848	0.470393	0.632471	0.827042	1.05692	0
													CoA conc (mM)	0.150848	0.156798	0.158118	0.165408	0.150988	0
													Averaged CoA conc (mM)	0.156432
